# Supplementary material for: Ku proteins interact with activator protein-2 transcription factors and contribute to ERBB2 overexpression in breast cancer cell lines
Source: PubMed Central journal article supplement (PMC2815545; doi:10.1186/bcr2450), 2009-11-11
Supplement: bcr2450-S1.pdf [file bcr2450-S1.pdf]

Additional data 1 : Mass Spectrometry identification of the Ku proteins interacting with AP-2 $\alpha$

| <b>Accession number</b> * | <b>Protein name</b>                              | <b>Mass</b> <sup>†</sup> | <b>Peptides matched</b> <sup>‡</sup> | <b>Total score</b> <sup>§</sup> |
|---------------------------|--------------------------------------------------|--------------------------|--------------------------------------|---------------------------------|
| P13010                    | ATP-dependent DNA<br>helicase II, 80 kDa subunit | 83091                    | 13                                   | 499                             |
| P12956                    | ATP-dependent DNA<br>helicase II, 70 kDa subunit | 69953                    | 7                                    | 209                             |

\* Accession numbers of the identified proteins in the UniProtKB/Swiss-Prot data base.

<sup>†</sup> Predicted molecular masses of identified proteins.

<sup>‡</sup> Numbers of peptides identified from the amino acid sequences of assigned proteins.

<sup>§</sup> Total probability scores from the Mascot search for identified proteins. Scores were >39 (limit).
